# Supplementary material for: The GBM Tumor Microenvironment as a Modulator of Therapy Response: ADAM8 Causes Tumor Infiltration of Tams through HB-EGF/EGFR-Mediated CCL2 Expression and Overcomes TMZ Chemosensitization in Glioblastoma
Source: MDPI journal article supplement (doi:10.3390/cancers14194910), 2022-10-07
Supplement: s1 [file s1]

**A**

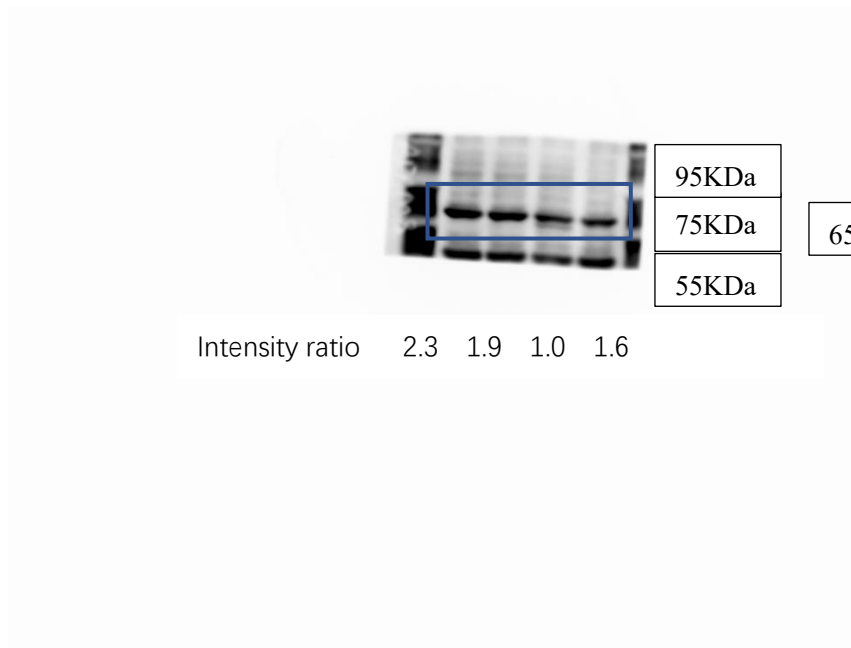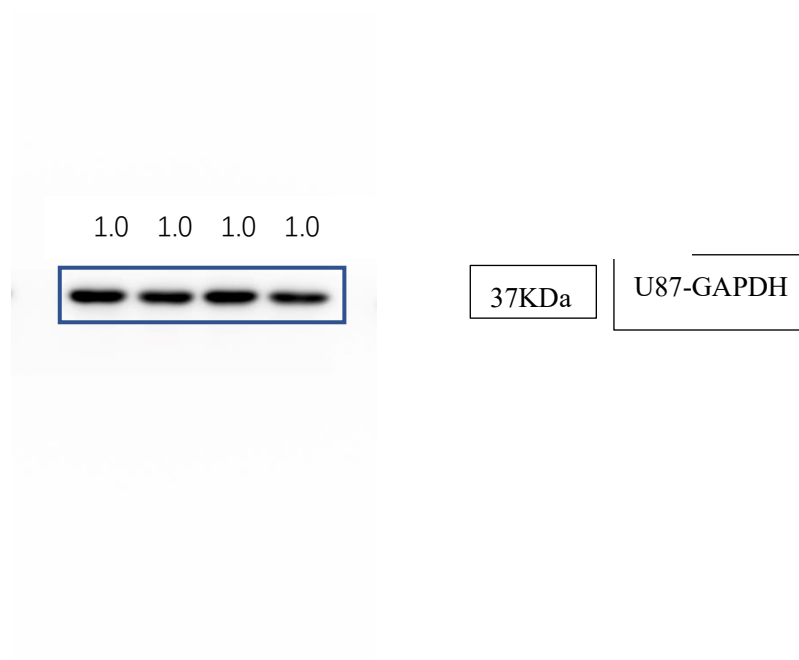

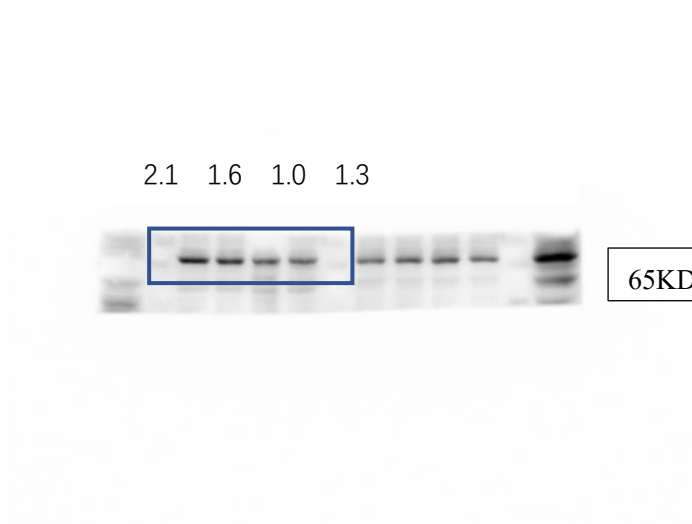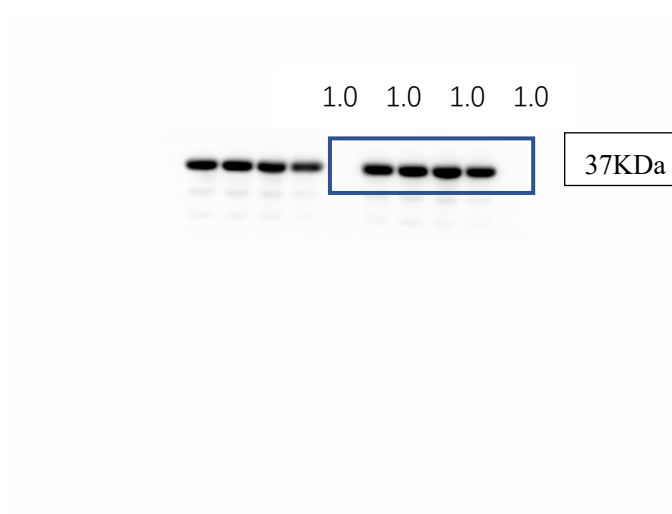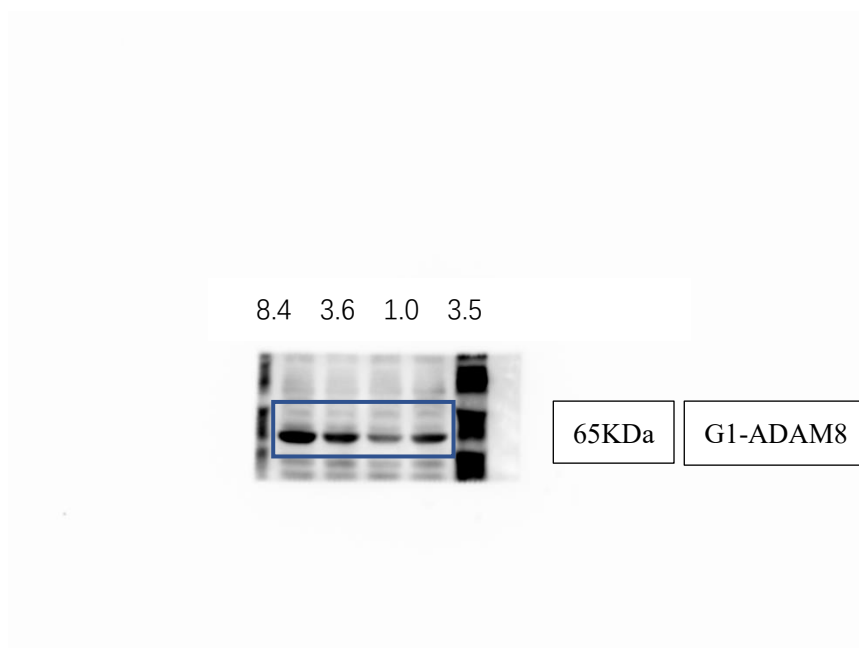

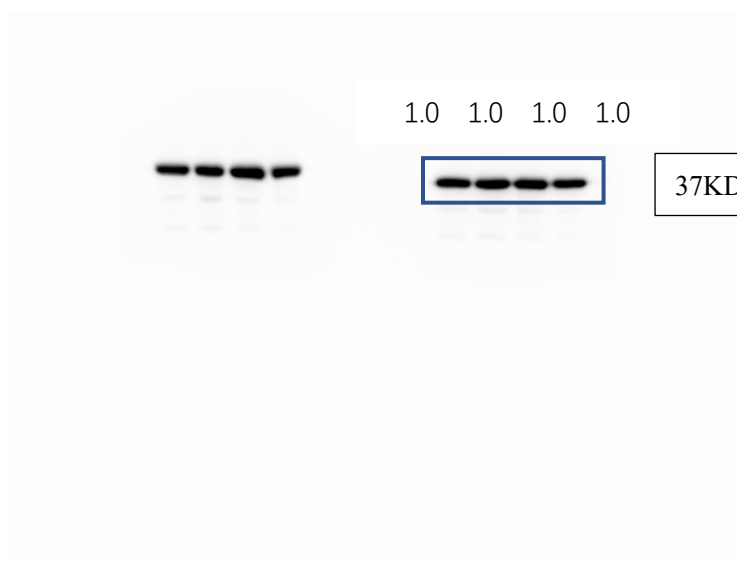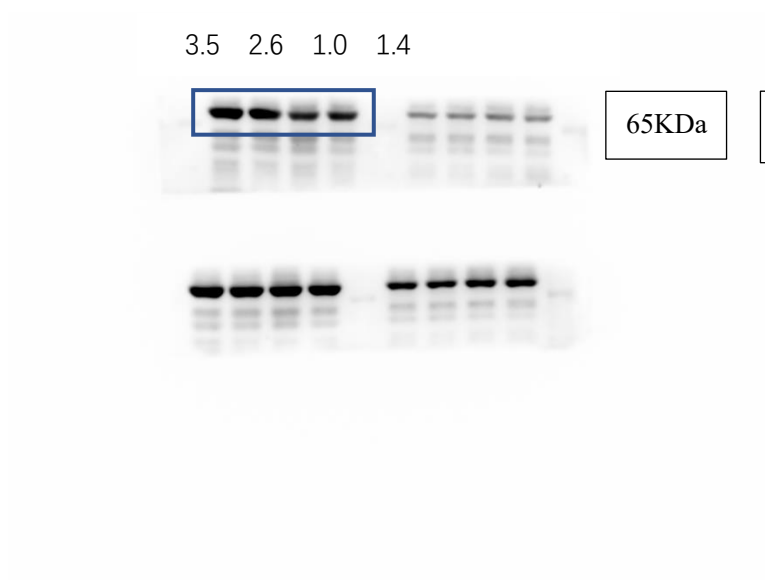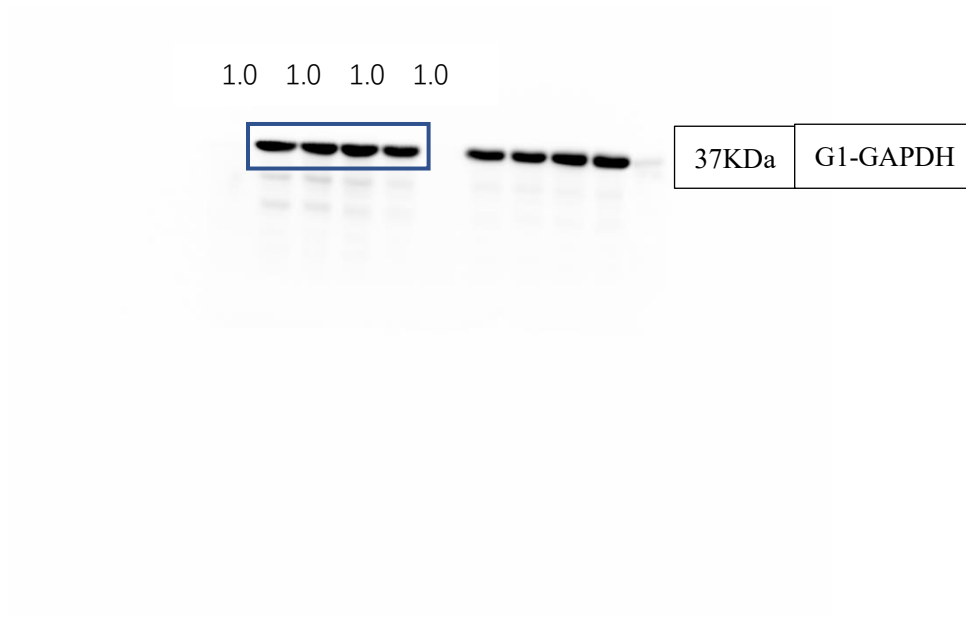

**B**

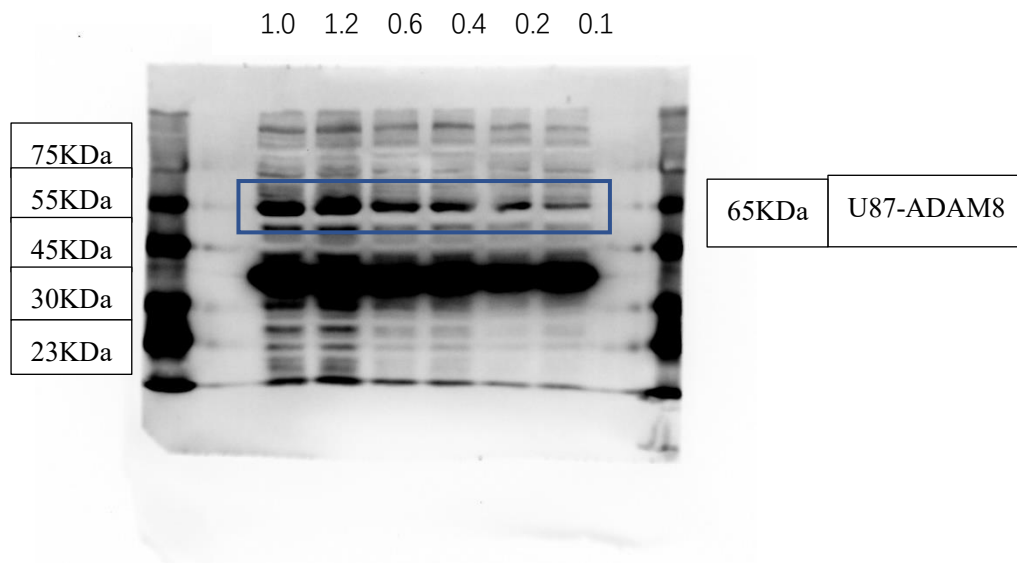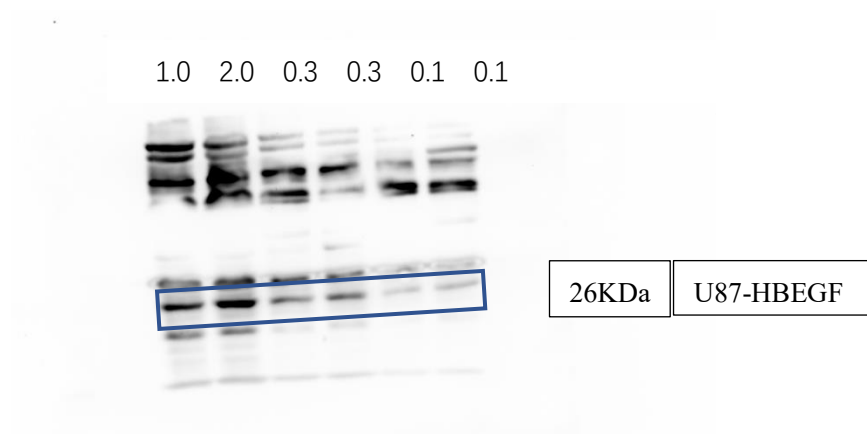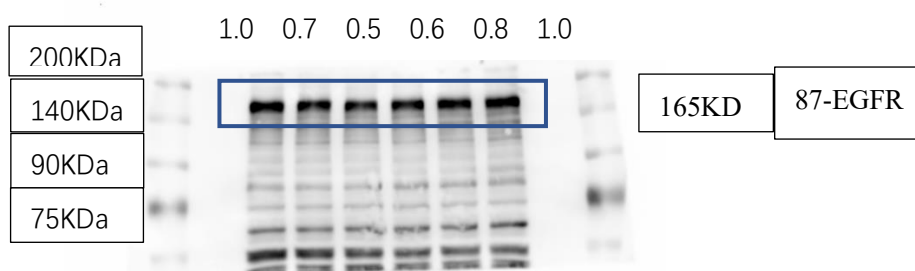

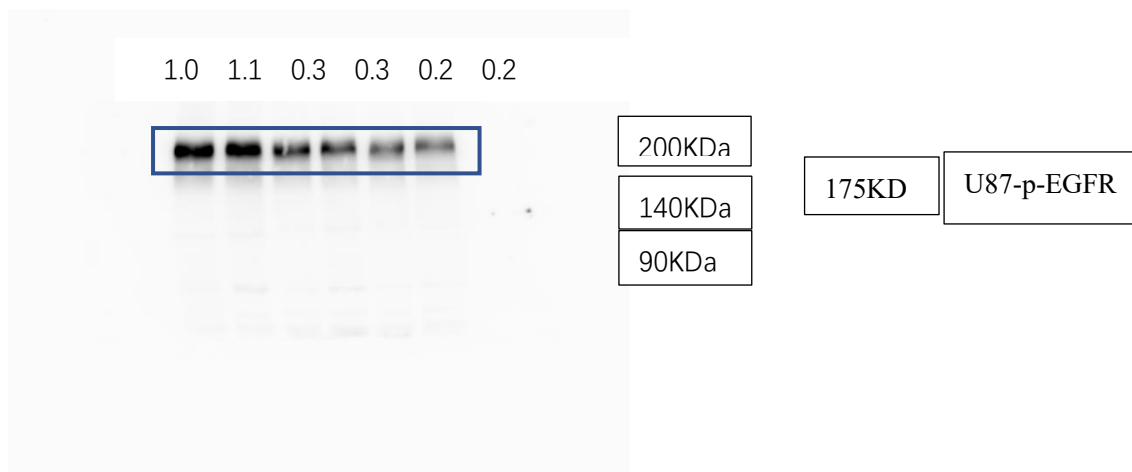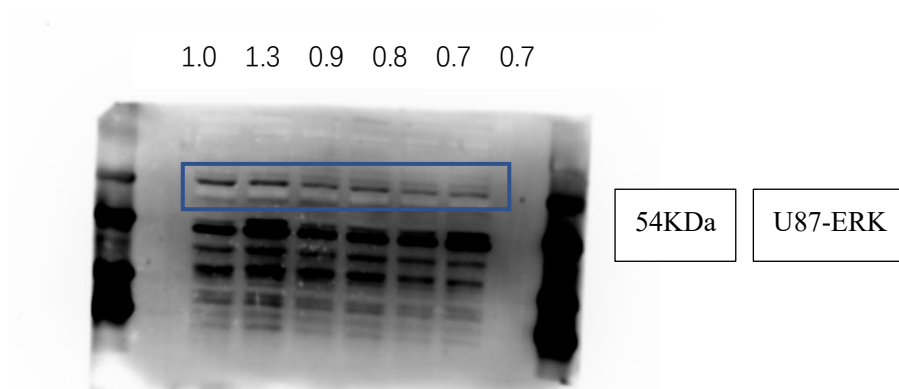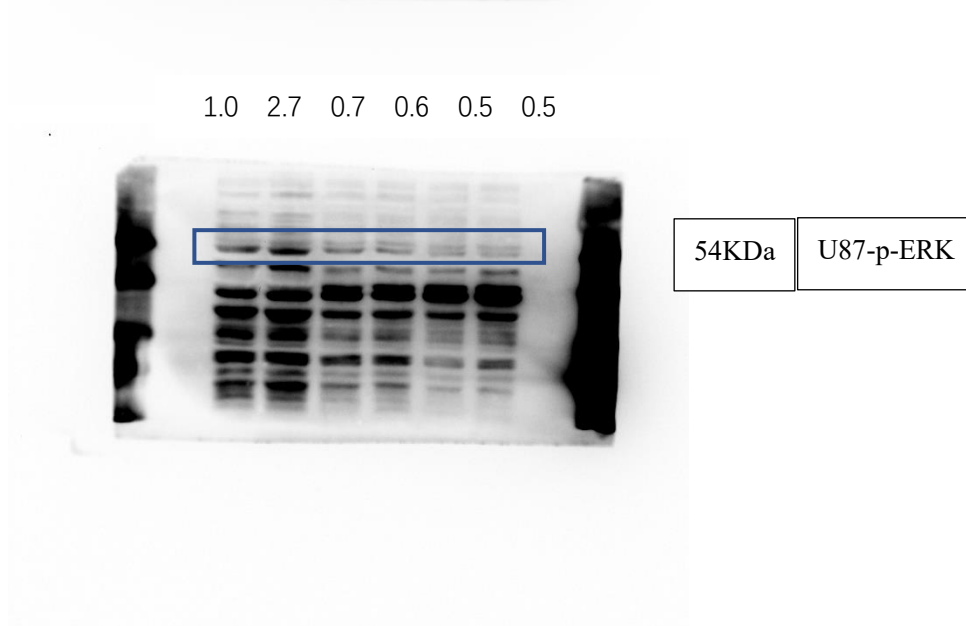

1.0 0.7 0.7 0.9 1.5 1.8

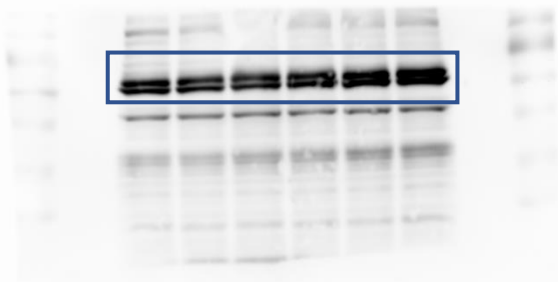

65KDa

U87-akt

1.0 1.6 0.6 0.8 0.3 0.2

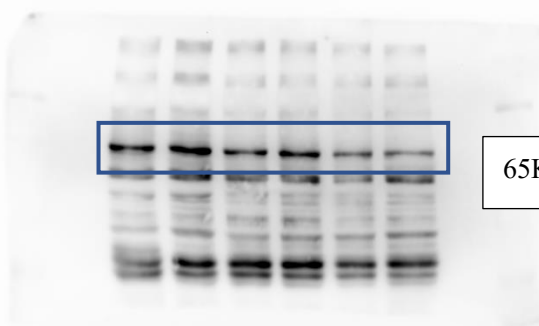

65KDa

U87-p-akt

1.0 1.0 1.0 1.0 1.0 1.0

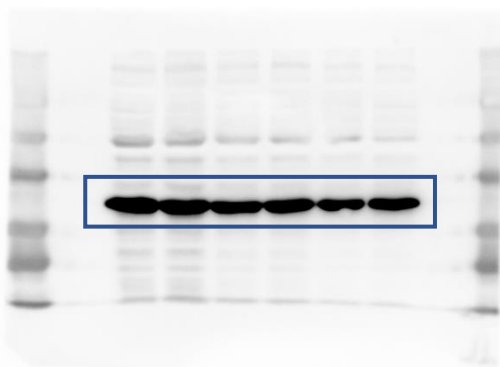

37KDa

U87-GAPDH

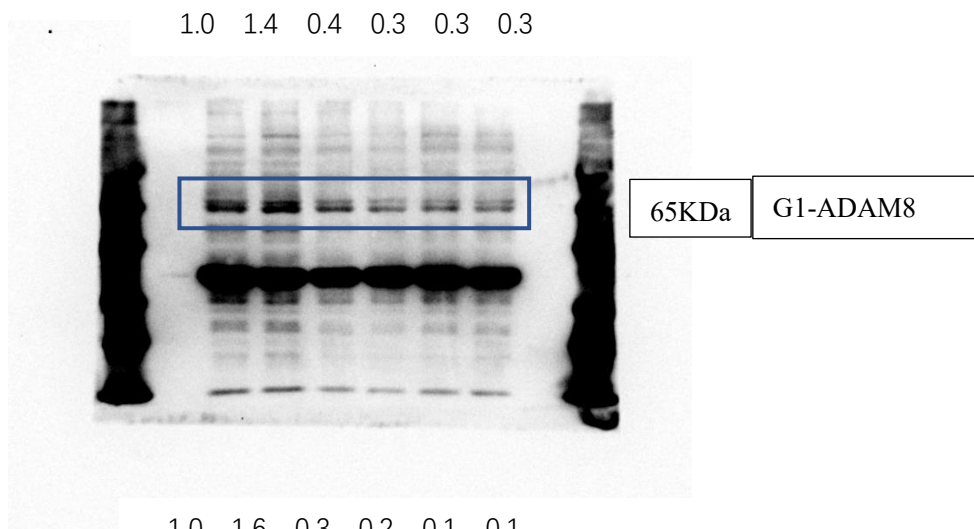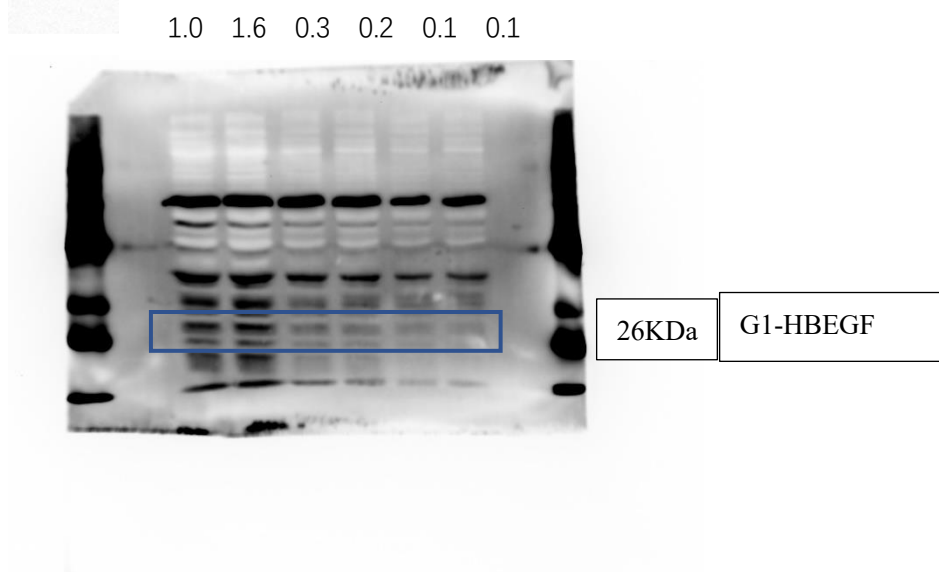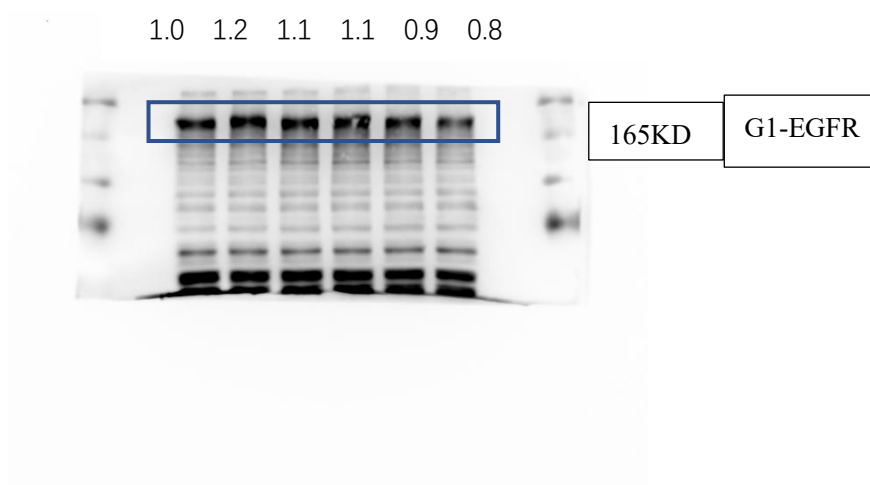

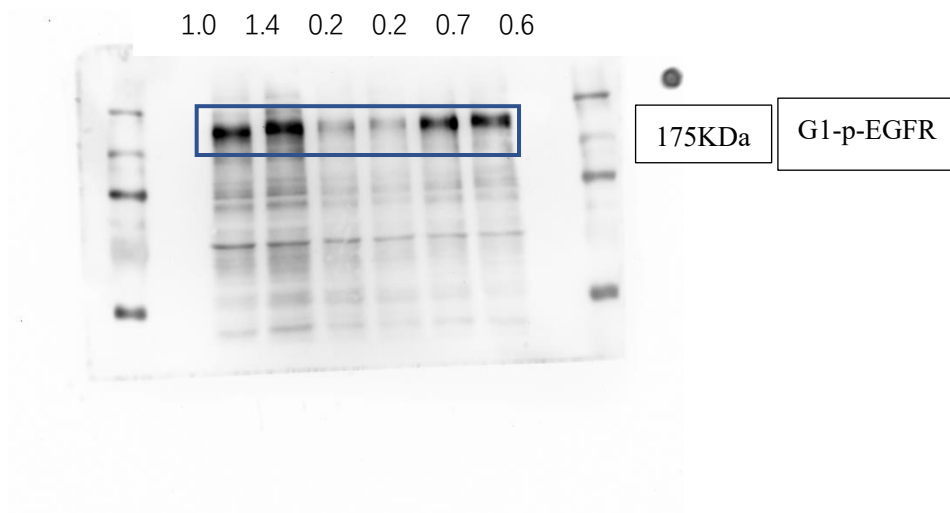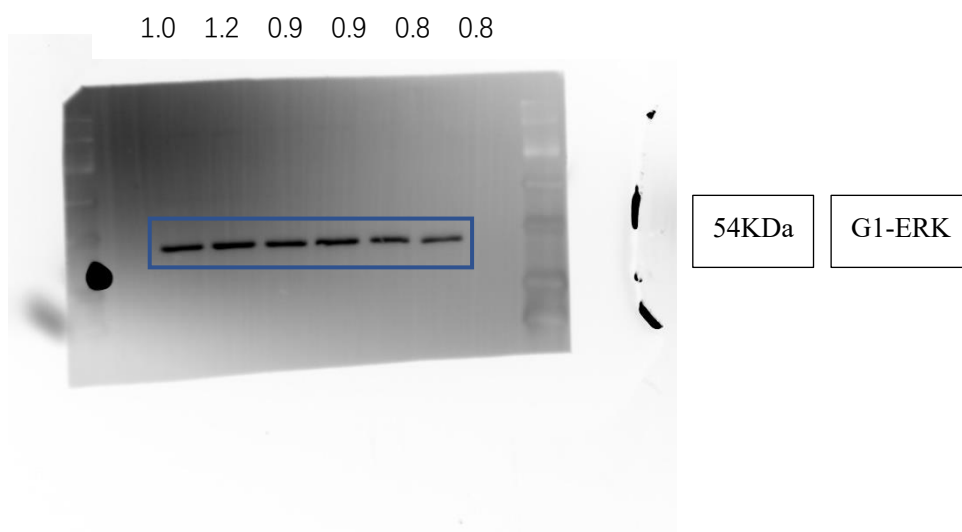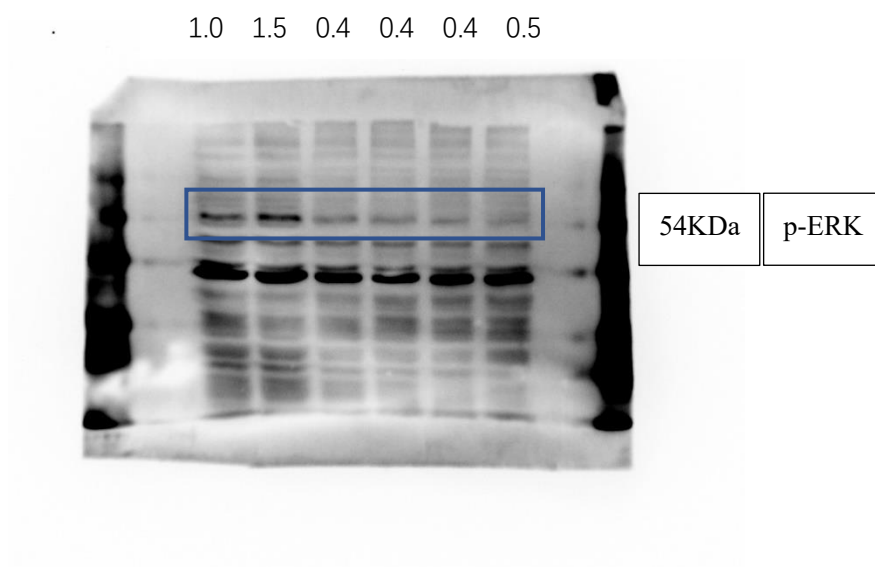



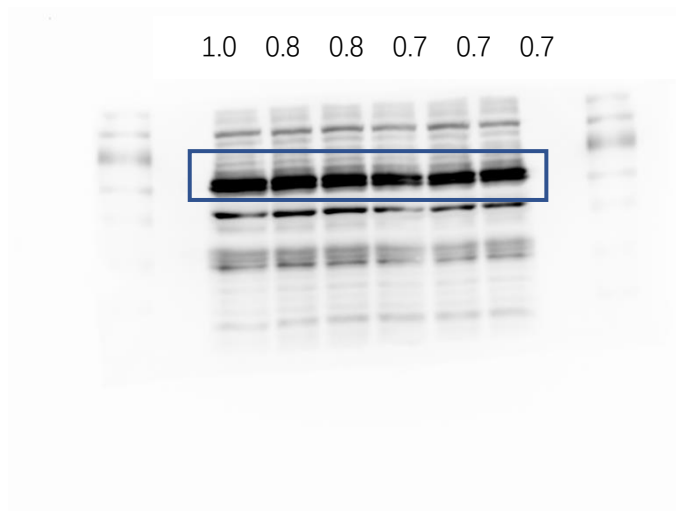

|       |        |
|-------|--------|
| 65KDa | G1-AKT |
|-------|--------|

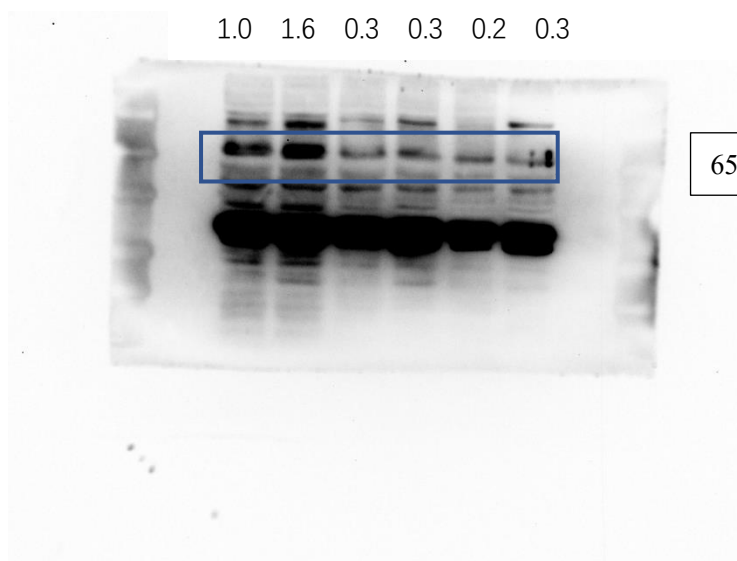

|       |          |
|-------|----------|
| 65KDa | G1-p-AKT |
|-------|----------|

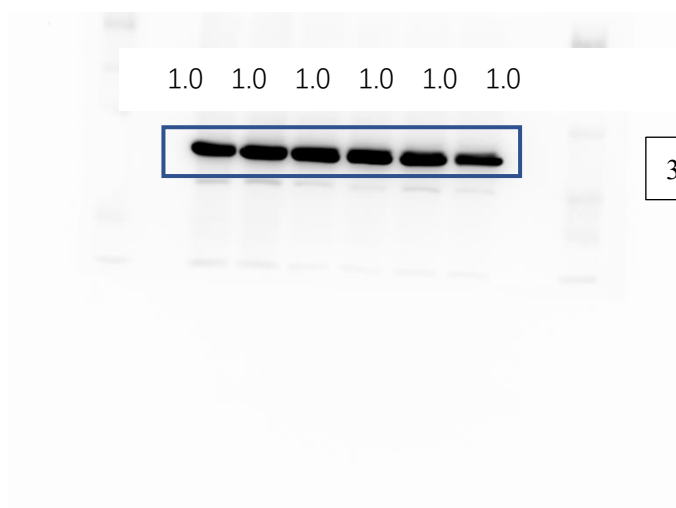

|       |          |
|-------|----------|
| 37KDa | G1-GAPDH |
|-------|----------|

C

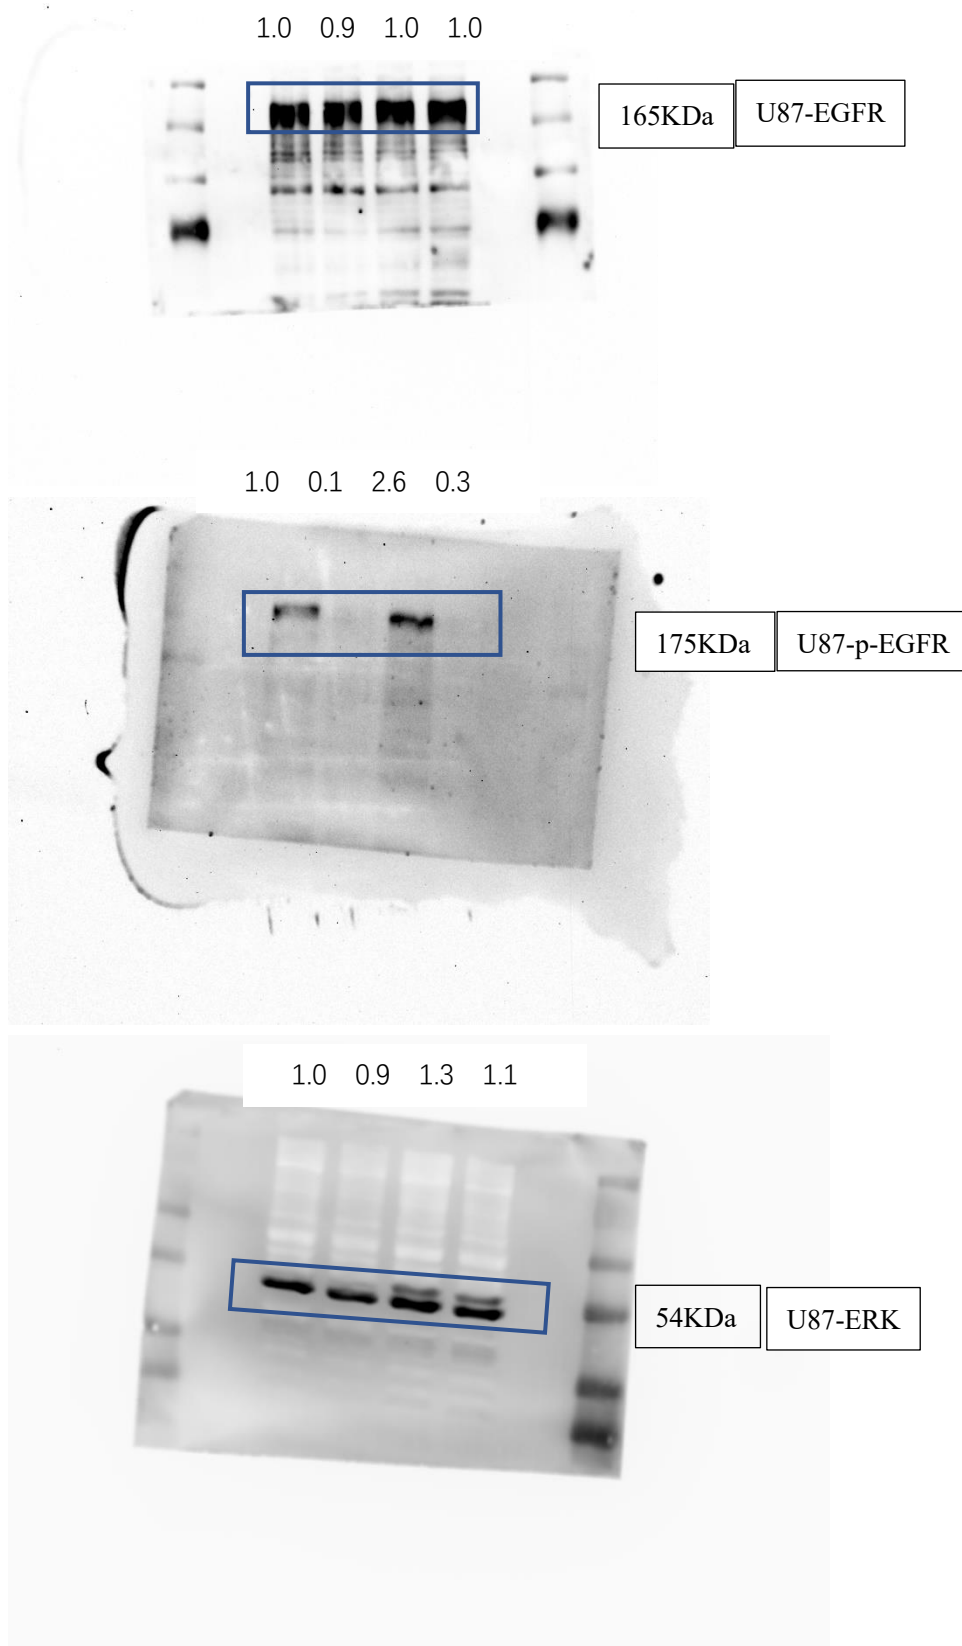

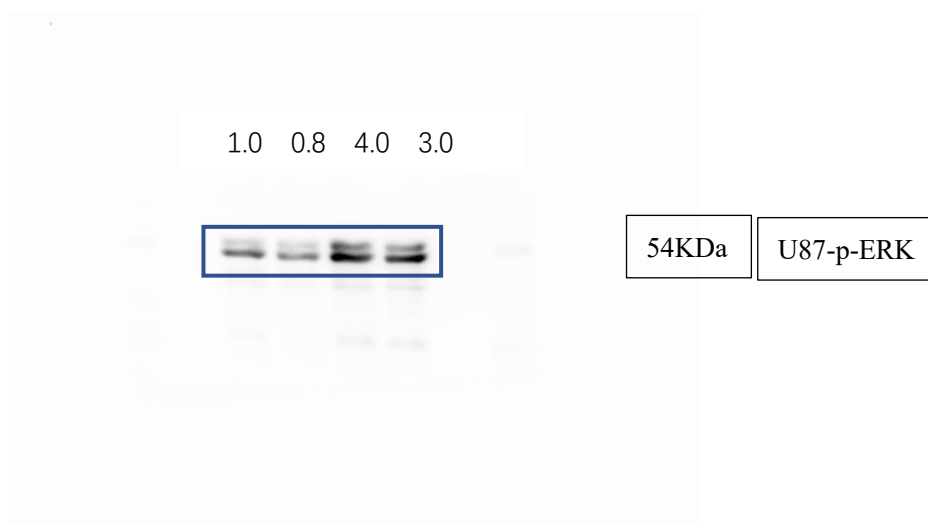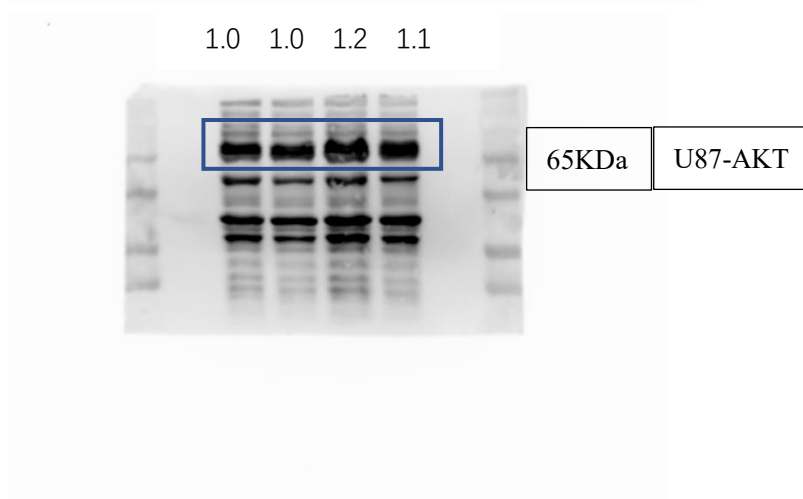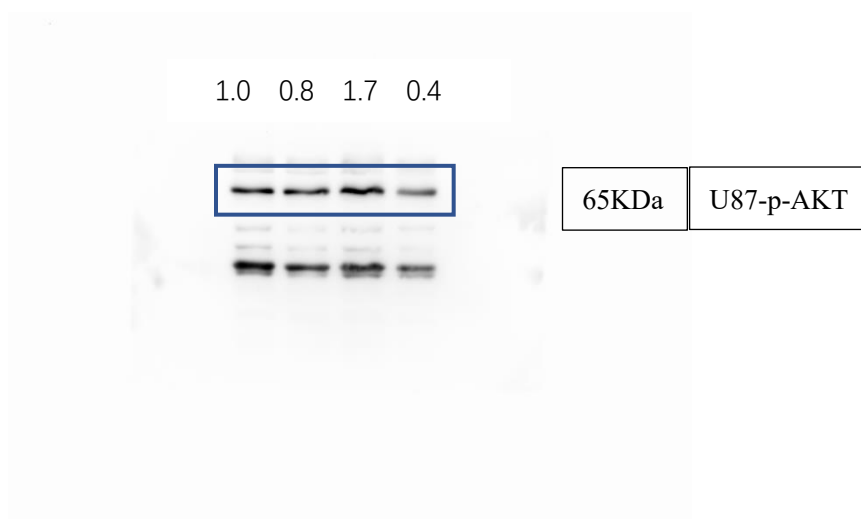

1.0 0.7 26.4 11.1

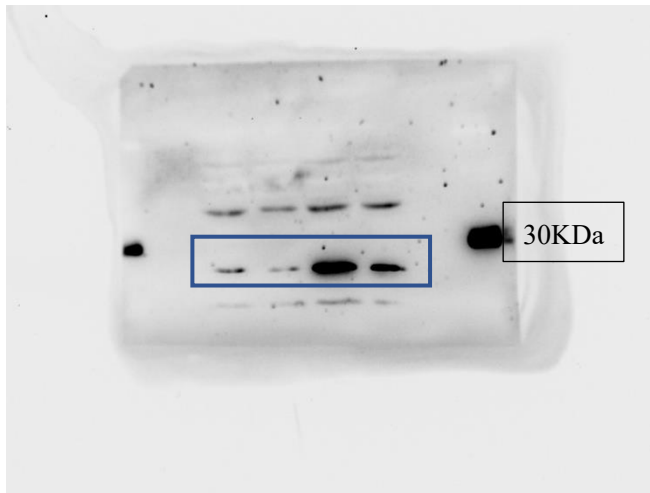

26KDa

U87-CCL2

1.0 1.0 1.0 1.0

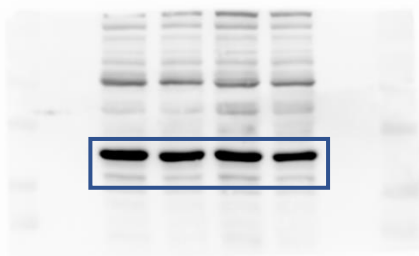

37KDa

U87-GAPDH

1.0 1.0 0.7 0.6

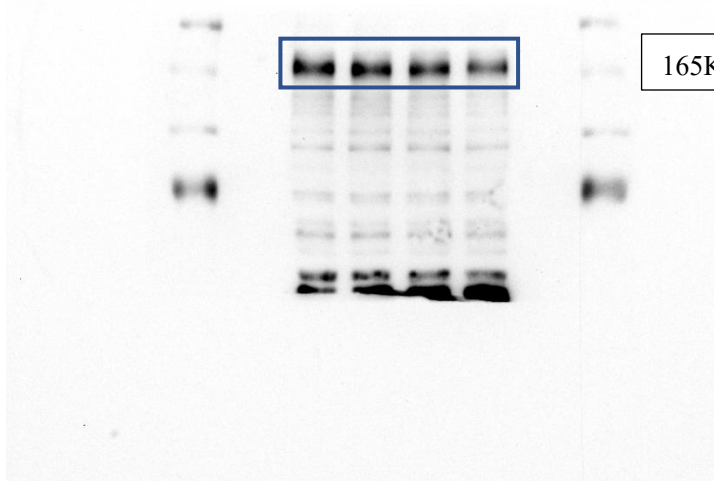

165KDa

G1-EGFR

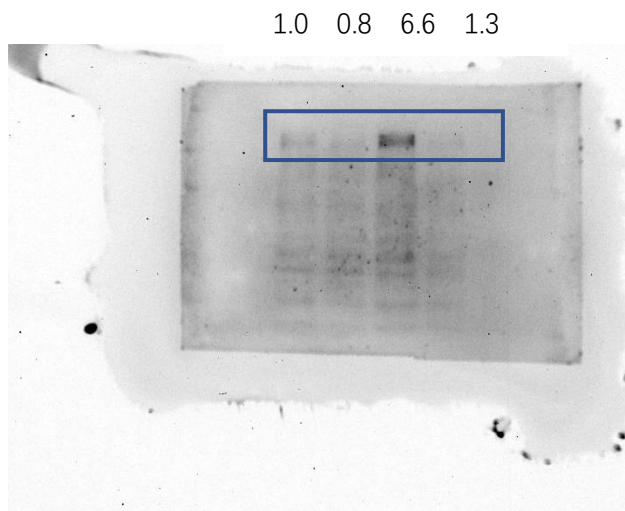

|        |           |
|--------|-----------|
| 175KDa | G1-P-EGFR |
|--------|-----------|

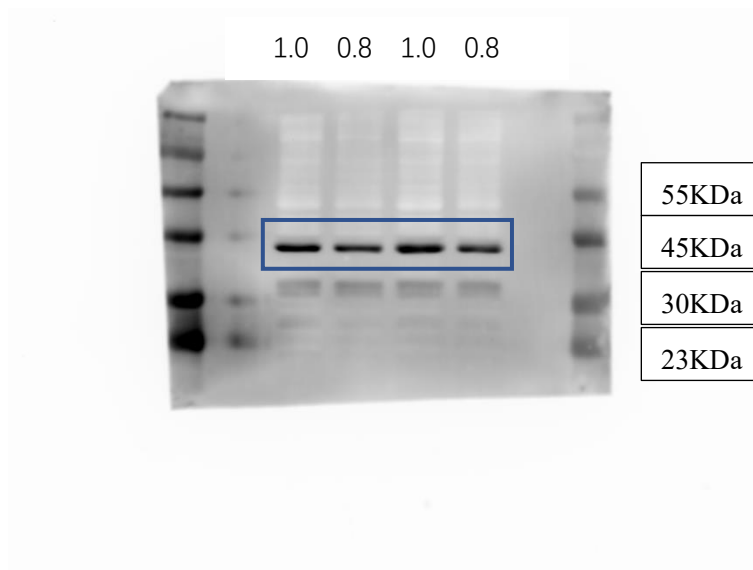

|       |
|-------|
| 55KDa |
| 45KDa |
| 30KDa |
| 23KDa |

|       |        |
|-------|--------|
| 54KDa | G1-ERK |
|-------|--------|

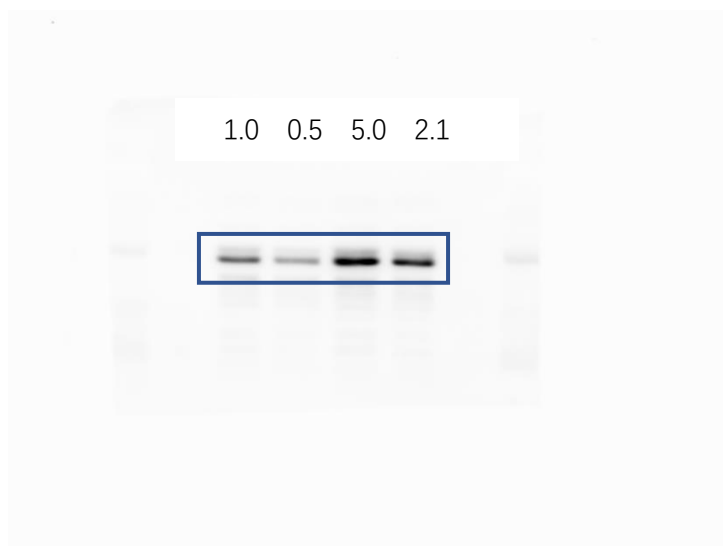

|       |          |
|-------|----------|
| 54KDa | G1-p-ERK |
|-------|----------|

1.0 0.8 1.3 0.9

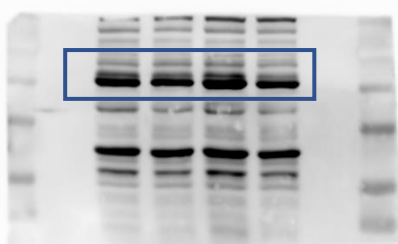

65KDa

G1-akt

1.0 0.5 1.3 0.6

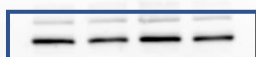

65KDa

G1-p-akt

1.0 0.6 2.1 0.7

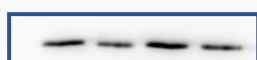

26KDa

G1-CCL2

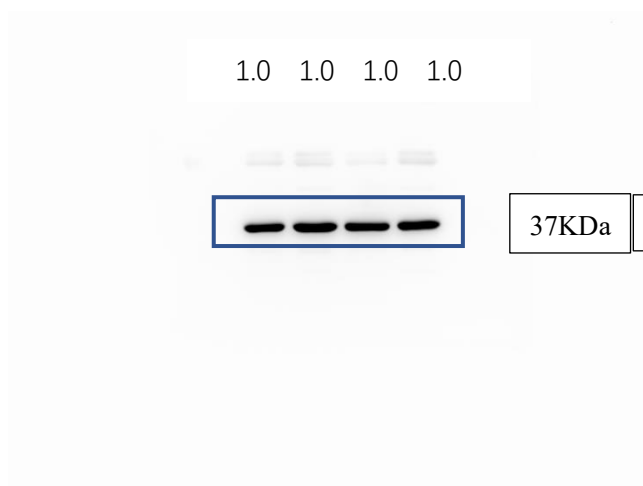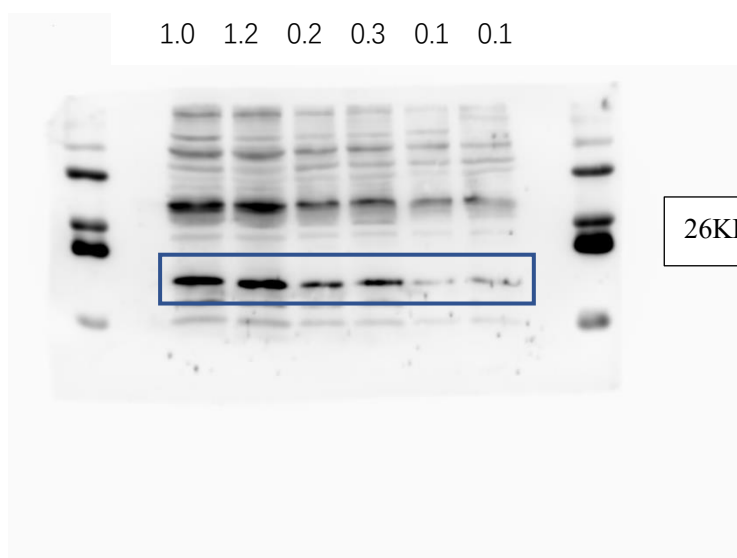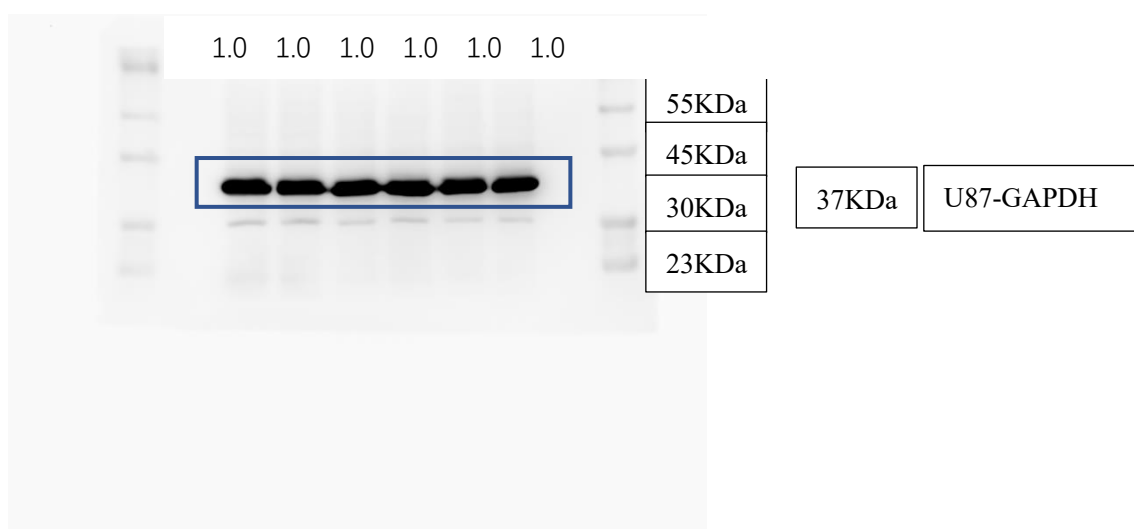

1.0 3.2 0.4 0.8 0.1 0.1

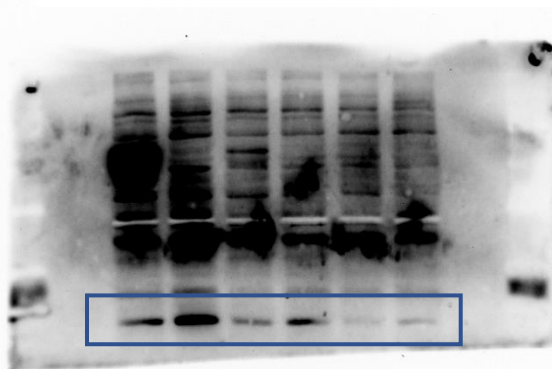

26KDa

G1-CCL2

1.0 1.0 1.0 1.0 1.0 1.0

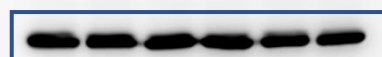

37KDa

G1-GAPDH
