# Supplementary material for: The GBM Tumor Microenvironment as a Modulator of Therapy Response: ADAM8 Causes Tumor Infiltration of Tams through HB-EGF/EGFR-Mediated CCL2 Expression and Overcomes TMZ Chemosensitization in Glioblastoma
Source: MDPI journal article supplement (doi:10.3390/cancers14194910), 2022-10-07
Supplement: s1 [file s1]

**Table S1. Antibodies and agents****Primary antibodies**

| <b>Names</b>  | <b>Company</b>                  | <b>Lot. No.</b>    |
|---------------|---------------------------------|--------------------|
| <b>ADAM8</b>  | <b>Proteintech (23778-1-AP)</b> | <b>00089073</b>    |
| <b>EGFR</b>   | <b>Proteintech (66455-1-2g)</b> | <b>10014314</b>    |
| <b>AKT</b>    | <b>Proteintech (60203-2-Ig)</b> | <b>10021367</b>    |
| <b>p-AKT</b>  | <b>Proteintech (66444-1-Ig)</b> | <b>10022023</b>    |
| <b>ERK</b>    | <b>Proteintech (11257-1-AP)</b> | <b>16443</b>       |
| <b>CCL2</b>   | <b>Proteintech (66272-1-Ig)</b> | <b>10011921</b>    |
| <b>IBA-1</b>  | <b>Abcam (ab5076)</b>           | <b>GR3253755-1</b> |
| <b>CD206</b>  | <b>Abcam (ab64693)</b>          | <b>GR134288-1</b>  |
| <b>GFAP</b>   | <b>Abcam (ab53554)</b>          | <b>GR119165-1</b>  |
| <b>HB-EGF</b> | <b>Abclonal (A16365)</b>        | <b>3507466001</b>  |
| <b>p-ERK</b>  | <b>CST (4370)</b>               | <b>12</b>          |
| <b>p-EGFR</b> | <b>CST (3777)</b>               | <b>16</b>          |
| <b>GAPDH</b>  | <b>Enogene</b>                  | <b>E12-042</b>     |

**Secondary antibodies**

| <b>Names</b>                                  | <b>company</b>                 | <b>Lot. No.</b>  |
|-----------------------------------------------|--------------------------------|------------------|
| <b>Cy3-conjugated Goat anti-rabbit</b>        | <b>Proteintech (SA00009-2)</b> | <b>20000328</b>  |
| <b>488-conjugated Goat anti-mouse</b>         | <b>Abbkine(A23210-1)</b>       | <b>133404A</b>   |
| <b>IFkine green Donkey anti-mouse</b>         | <b>Abbkine(A24211-1)</b>       | <b>133702A</b>   |
| <b>488-conjugated Donkey anti-goat</b>        | <b>Servicebio(GB25404)</b>     | <b>CR2104104</b> |
| <b>Cy3-conjugated Donkey anti-rabbit</b>      | <b>Servicebio(GB21403)</b>     | <b>CR2105134</b> |
| <b>Peroxidase-conjugated goat anti-rabbit</b> | <b>Proteintech (SA00001-2)</b> | <b>20000003</b>  |
| <b>Peroxidase-conjugated Goat anti-mouse</b>  | <b>Proteintech (SA00001-1)</b> | <b>20000002</b>  |

**Main agents**

| <b>Names</b>        | <b>company</b>         | <b>Lot. No.</b> |
|---------------------|------------------------|-----------------|
| <b>Temozolomide</b> | <b>Selleck (s1237)</b> | <b>S123708</b>  |
| <b>Erlotinib</b>    | <b>Selleck (s1023)</b> | <b>S102305</b>  |

**ELISA kit**

|                              |                    |                   |
|------------------------------|--------------------|-------------------|
| <b>Human MCP-1 ELISA kit</b> | <b>Elabscience</b> | <b>E-EL-H6005</b> |
|------------------------------|--------------------|-------------------|

**Table S2. Sequences of primer**

| <b>Primers</b>  | <b>Sequences</b>         |
|-----------------|--------------------------|
| <b>ADAM8-F</b>  | GATGATGCTGCCTGCGATTG     |
| <b>ADAM8-R</b>  | AAGGACGTAGCTCACCCTCT     |
| <b>HBEGF-F</b>  | GTCACCTTTATCCTCCAAGCCAC  |
| <b>HBEGF-R</b>  | CTCAGCCCATGACACCTCTCT    |
| <b>CCL2-F</b>   | TCTCAAAGTGAAGCTCGCACT    |
| <b>CCL2-R</b>   | ACACTTGCTGCTGGTGATTCT    |
| <b>Mmp1-F</b>   | AGAAAGAAGACAAAGGCAAGTTGA |
| <b>Mmp1-R</b>   | CTCTTGCAAATCTGGCGTG      |
| <b>Mmp2-F</b>   | GTCTGTGTTGTCCAGAGGCA     |
| <b>Mmp2-R</b>   | ATCACTAGGCCAGCTGGTTG     |
| <b>Mmp7-F</b>   | ACAATTGTCTCTGGACGGCA     |
| <b>Mmp7-R</b>   | CACATCTGGGCTTCTGCATT     |
| <b>Mmp9-F</b>   | TTGTGCTCTTCCCTGGAGAC     |
| <b>Mmp9-R</b>   | CCGAGTGTAACCATAGCGGT     |
| <b>Mmp12-F</b>  | CCTGAACAGCTCTACAAGCCT    |
| <b>Mmp12-R</b>  | TCCAGGGTAGATGTGTCCAGT    |
| <b>Mmp14-F</b>  | CAGTTCGCCGACTAAGCAGA     |
| <b>Mmp14-R</b>  | CGGGAGACATGGTCCGAGA      |
| <b>ADAM8-F</b>  | GATGATGCTGCCTGCGATTG     |
| <b>ADAM8-R</b>  | AAGGACGTAGCTCACCCTCT     |
| <b>ADAM10-F</b> | TGCTGCTGTTAACCCGTGA      |
| <b>ADAM10-R</b> | GATTCCCATACTGACCTCCCA    |
| <b>ADAM12-F</b> | TGCCTTCTCTCACTAACGCT     |
| <b>ADAM12-R</b> | GCTGAGCTCTTCTAGCCTTTC    |
| <b>ADAM17-F</b> | GGCGGTAGAATCTTCCCAGT     |
| <b>ADAM17-R</b> | ACCACGCTGGTCAGGAATAG     |
| <b>ADAM19-F</b> | GCTCTGCTTGCTGGCGTTT      |
| <b>ADAM19-R</b> | TTCTCGCCCCTCAGCCATTA     |
| <b>GAPDH-F</b>  | GGAAGCTTGTCATCAATGGAAATC |
| <b>GAPDH-R</b>  | TGATGACCCTTTTGGCTCCC     |
